# Supplementary material
Source: MDPI journal article supplement (https://www.mdpi.com/2073-4433/13/2/194)
Supplement: s1 [file s1]

## Supplementary Materials:

Lu Gao <sup>1,2,3,\*</sup>, Jianhui Wei <sup>4</sup>, Xiangyong Lei <sup>1,2</sup>, Miaomiao Ma <sup>5</sup>, Lan Wang <sup>6</sup>, Xiaojun Guan <sup>6</sup> and Hui Lin <sup>6</sup>

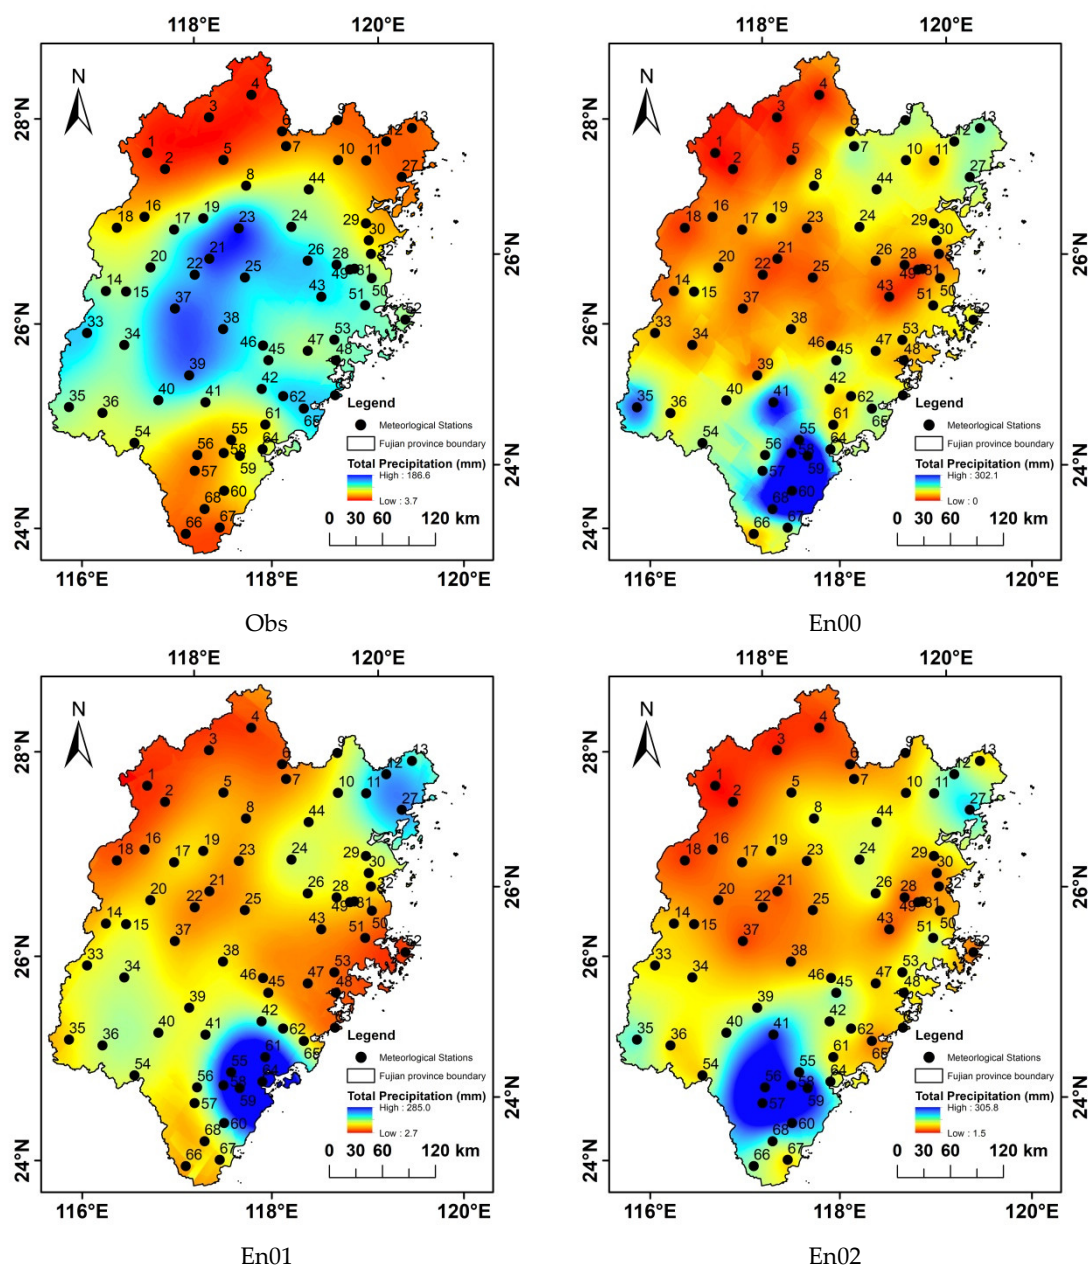

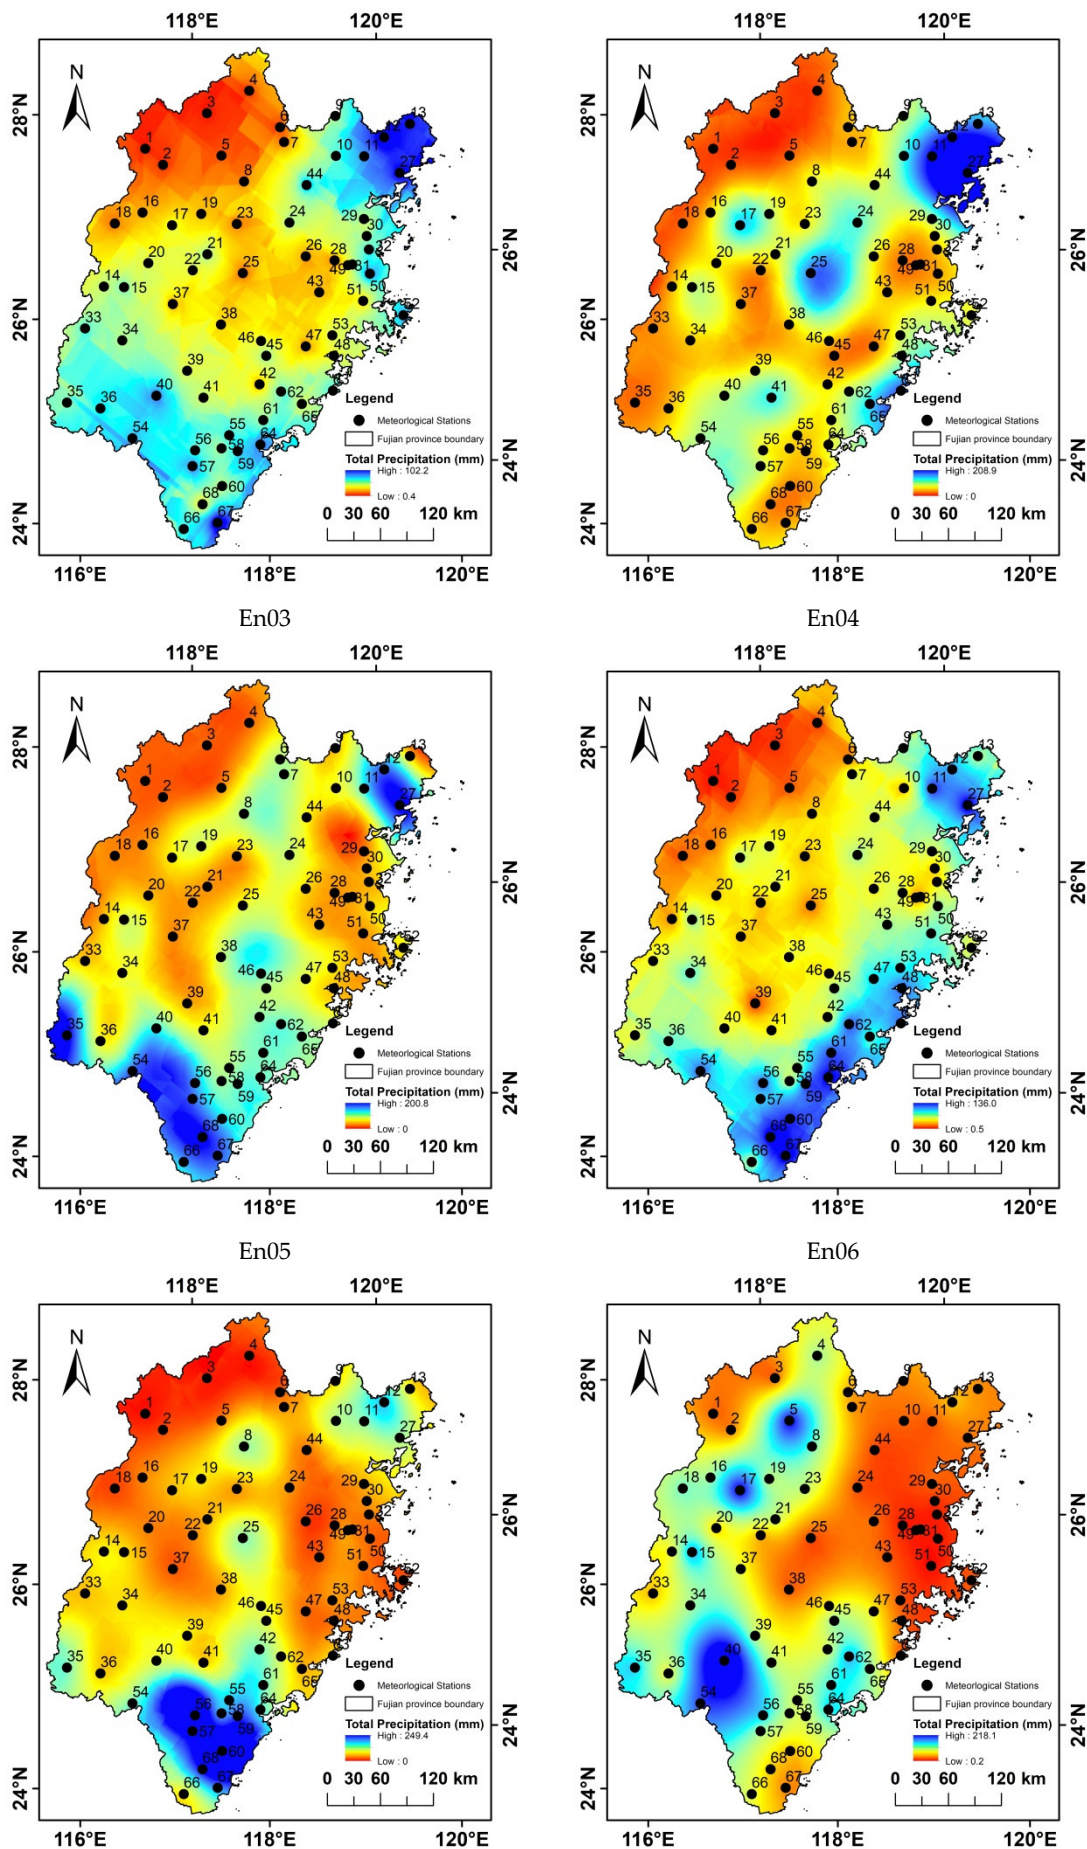

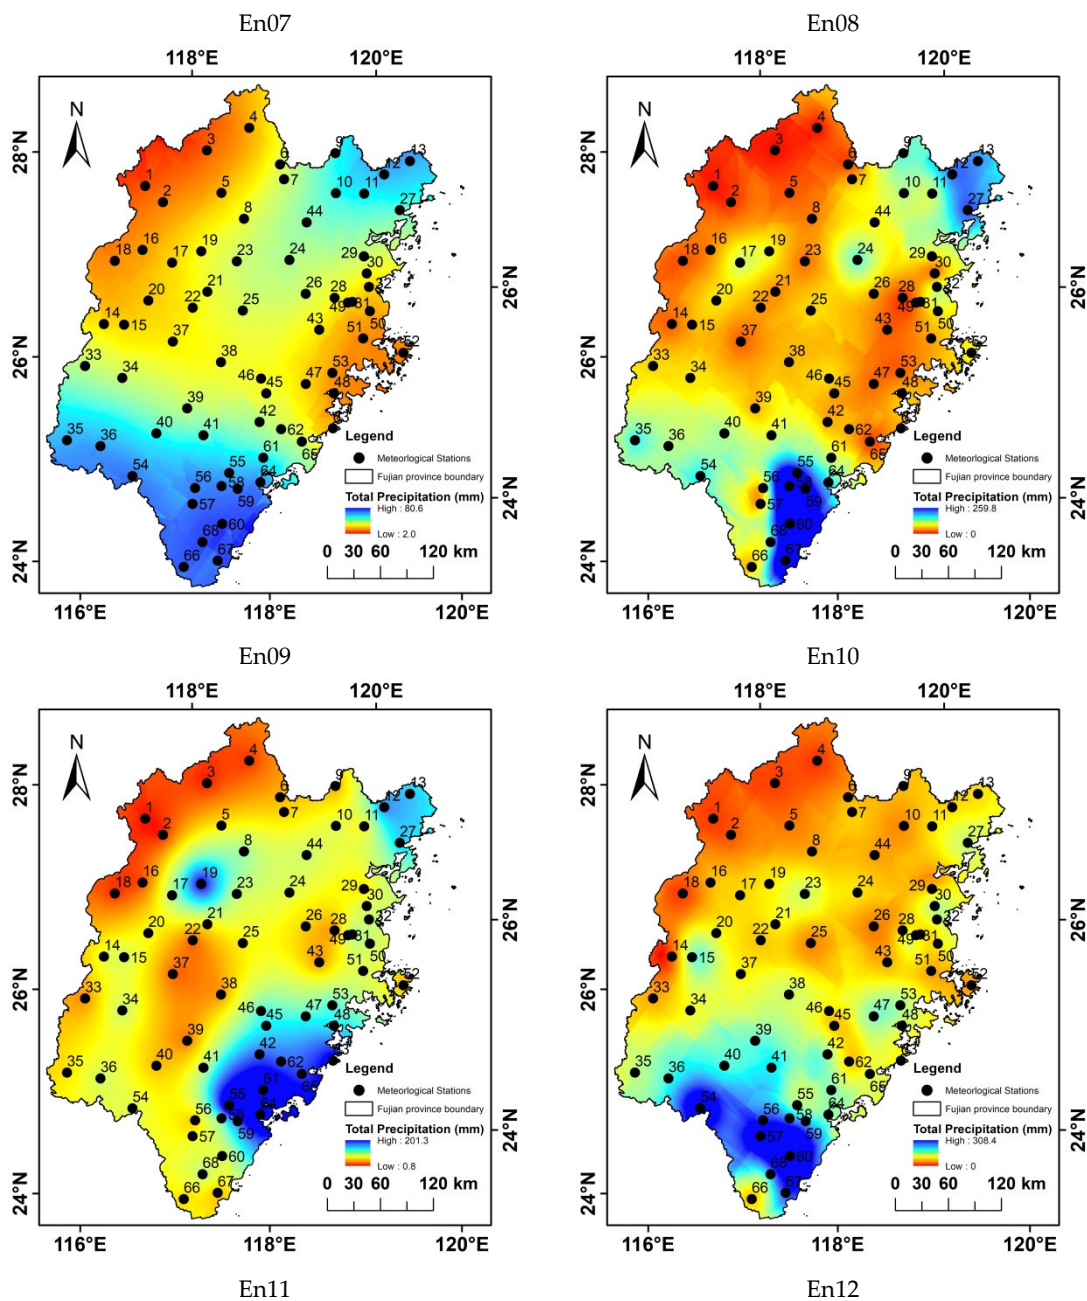



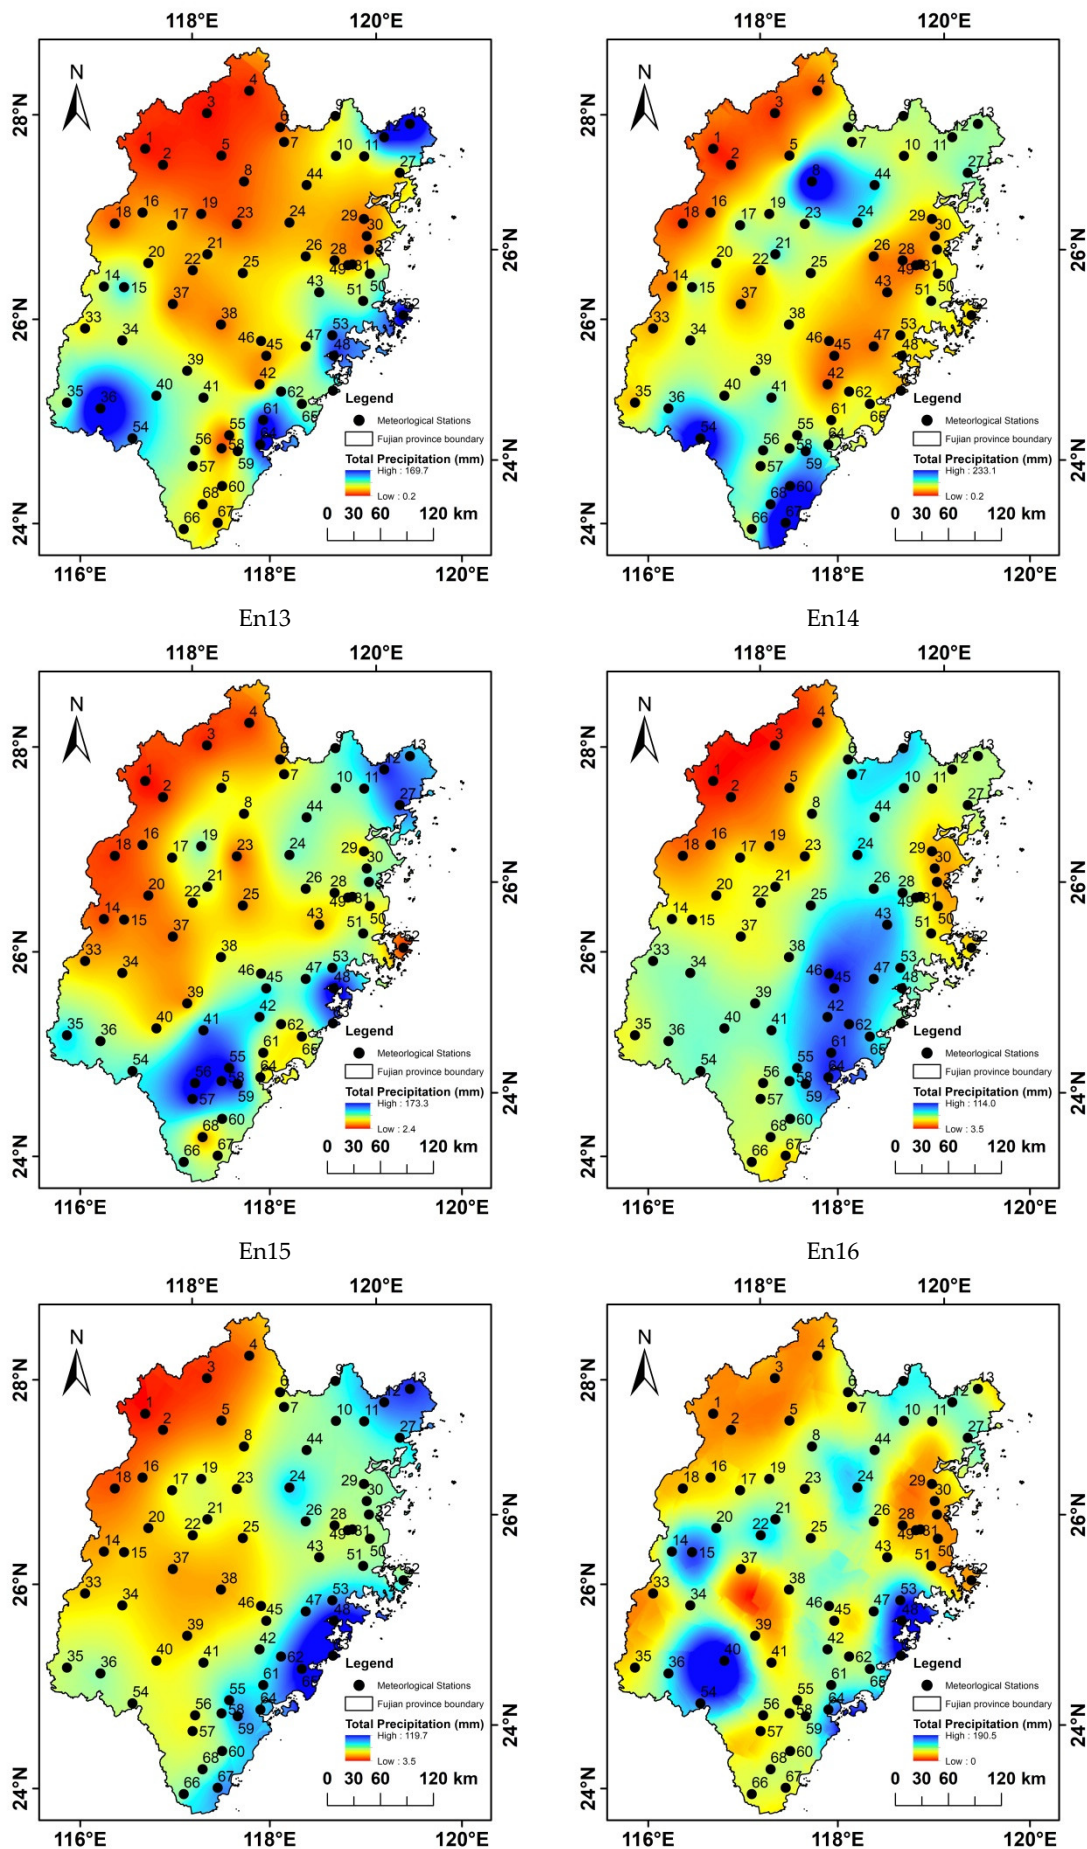

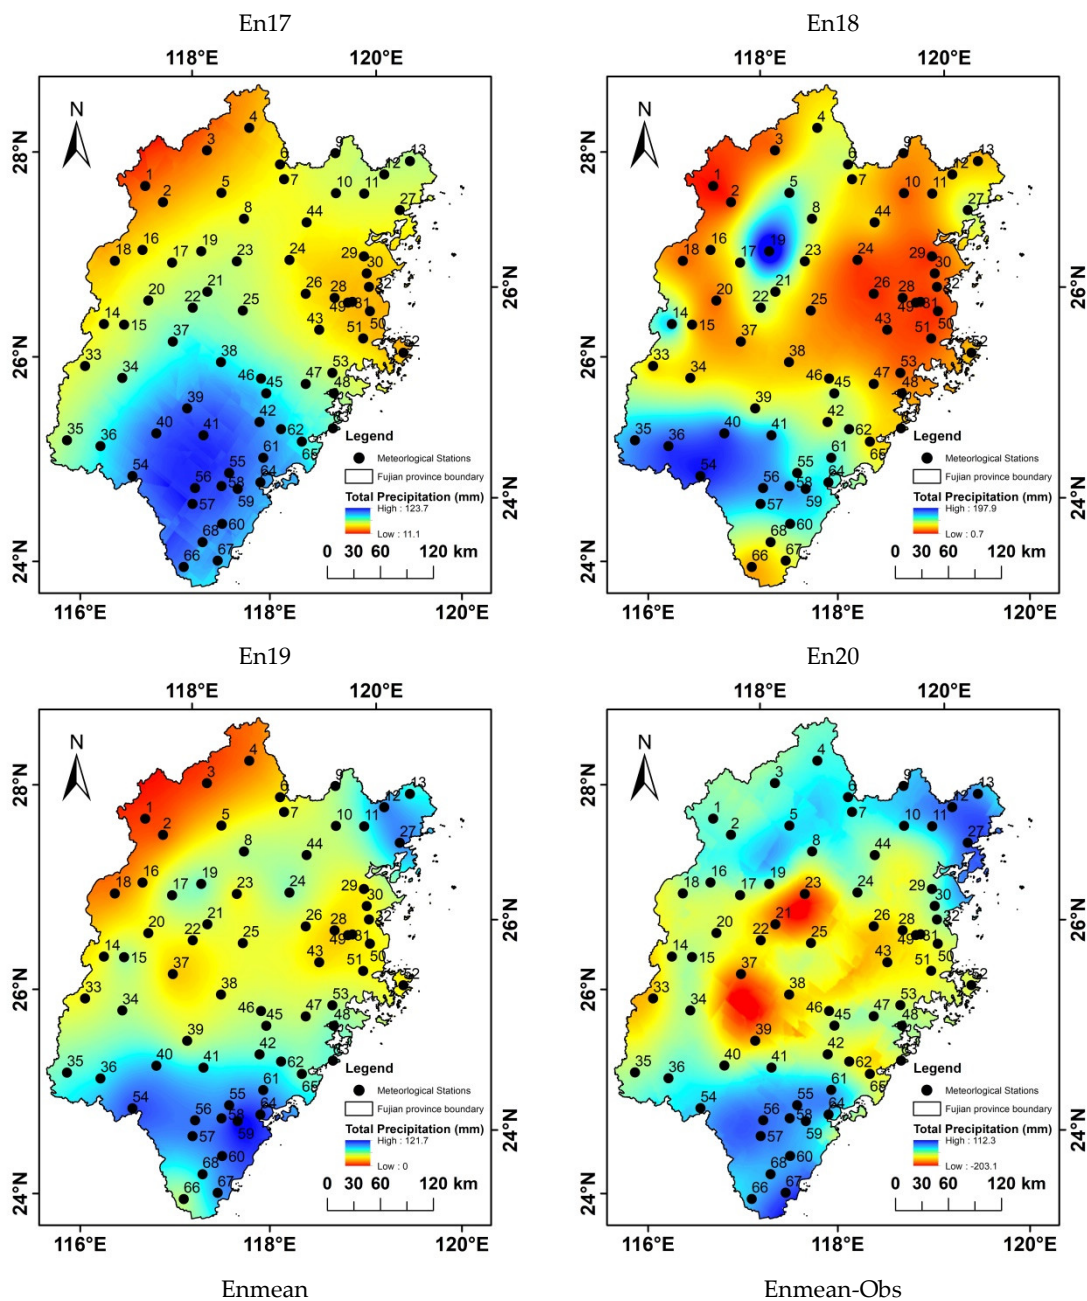

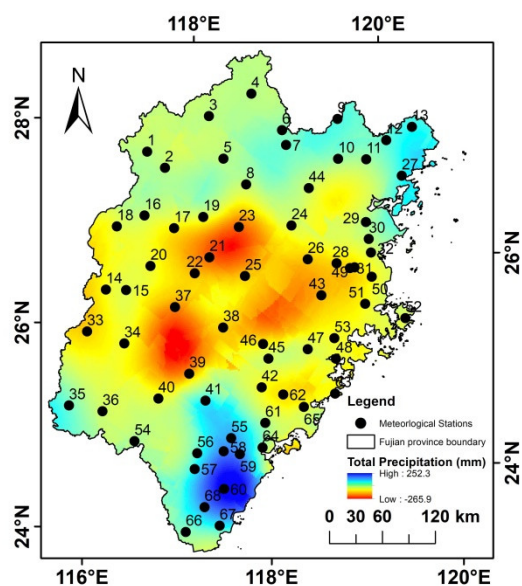

En00-Obs

**Figure S1:** Spatial distribution of TCP from 01 UTC 15th June to 18 UTC 16th June 2010 for all WRF model outputs and observations.
